# Supplementary material
Source: PubMed Central journal article supplement (PMC5389896)

**Supplemental data:**

Supplemental Table 1: Demographic, clinical, imaging and biochemical characteristics of study population at baseline exam stratified by sex- specific quartiles of visceral adipose tissue (VAT)

Supplemental Table 2: Cox proportional hazard models of visceral adipose tissue (VAT) and incident cancer

Supplemental Table 3: Number of incident cancers and rates on incident cancer at 12 years in quartiles of visceral adipose tissue (VAT), overall and in sex and race subgroups

Supplemental Table 4: Cox proportional hazard models of lower body fat (LBF) and incident cancer

Supplemental Table 5: Cox proportional hazard models of Subcutaneous Adipose Tissue (SAT) and Liver Fat and incident cancer

Supplemental Table 6: Cox proportional hazard models of visceral adipose tissue (VAT) and incident cancer in Males

Supplemental Table 7: Cox proportional hazard models of visceral adipose tissue (VAT) and incident cancer in Females

Supplemental Table 8: Cox proportional hazard models of visceral adipose tissue (VAT) and incident cancer in Whites

Supplemental Table 9: Cox proportional hazard models of visceral adipose tissue (VAT) and incident cancer in Non- whites

Supplemental Table 10A: Cox proportional hazard models of Waist Circumference (WC) and Waist Hip Ratio (WHR), and incident cancer

Supplemental Table 10B: Cox proportional hazard models of Body mass index (BMI) and incident cancer

Supplemental Table 10C: Cox proportional hazard models of Triglyceride- waist circumference and incident cancer

Supplemental Table 11: Cox proportional hazard models of visceral adipose tissue (VAT) and incident cancer including cancer cases diagnosed in the 1 year censoring period

Supplemental Table 12: Cox proportional hazard models of visceral adipose tissue (VAT) and incident cancer excluding lung and esophageal cancer cases

Supplemental Table 13: Cox proportional hazard models of visceral adipose tissue (VAT) and incident cancer excluding lung and esophageal cancer cases, and hematological malignancies

Supplemental Table 14: Cox proportional hazard models of visceral adipose tissue (VAT) and incident cancer excluding breast and prostate cancer cases

Supplemental Table 15: Cox proportional hazard models of visceral adipose tissue (VAT) and incident obesity- associated cancer

Supplemental Table 16: Cox proportional hazard models of visceral adipose tissue (VAT) and incident visceral cancers

Supplemental Table 17: Cox proportional hazard models of Lower Body Fat (LBF) and incident cancer in Males

Supplemental Table 18: Cox proportional hazard models of Lower Body Fat (LBF) and incident cancer in Females

Supplemental Table 19: Levels of liver fat in racial groups, and number of incident cancers and rates of incident cancer at 12 years in each quartile of race-adjusted liver fat

Supplemental Table 20: Cox proportional hazard models of Liver fat and incident cancer in Racial groups

Supplemental Figure: Flow Diagram of the Dallas Heart Study Cohort

**Supplemental Table 1:** Demographic, clinical, imaging and biochemical characteristics of study population at baseline exam stratified by sex- specific quartiles of visceral adipose tissue (VAT)  
(data are reported as median (interquartile range) or number (%), as appropriate)

| Characteristic                              | Overall<br>(n=2627)  | Quartile 1<br>(n=656) | Quartile 2<br>(n=657) | Quartile 3<br>(n=658) | Quartile 4<br>(n=656) | P-value<br>of trend |
|---------------------------------------------|----------------------|-----------------------|-----------------------|-----------------------|-----------------------|---------------------|
| <b>VAT characteristics</b>                  |                      |                       |                       |                       |                       |                     |
| VAT range - Overall (kg)                    | 2.06 (1.44, 2.75)    | 1.08 (0.86, 1.27)     | 1.71 (1.51, 2.14)     | 2.26 (2, 2.8)         | 3.27 (2.68, 3.73)     | <.01                |
| VAT range - Females (kg)                    |                      | 0.44- 1.27            | 1.28- 1.75            | 1.75- 2.31            | 2.31- 5.16            | <.01                |
| VAT range – Males (kg)                      |                      | 0.45- 1.76            | 1.76- 2.51            | 2.51- 3.21            | 3.22- 6.95            | <.01                |
| <b>Clinical characteristics</b>             |                      |                       |                       |                       |                       |                     |
| Age (years)                                 | 43 (36, 51)          | 39 (33, 47)           | 42 (36- 49)           | 45 (37- 52)           | 47 (40-54)            | <.01                |
| Male                                        | 1209 (46.0%)         | 302 (46.0%)           | 302 (46.0%)           | 303 (46.0%)           | 302 (46.0%)           | .99                 |
| Race                                        |                      |                       |                       |                       |                       |                     |
| Black                                       | 1293 (49.2%)         | 376 (57.3%)           | 352 (53.6%)           | 308 (46.8%)           | 257 (39.2%)           | <.01                |
| White                                       | 822 (31.3%)          | 204 (31.1%)           | 171 (26%)             | 205 (31.2%)           | 242 (36.9%)           | <.01                |
| Hispanic                                    | 456 (17.4%)          | 60 (9.1%)             | 118 (18%)             | 132 (20.1%)           | 146 (22.3%)           | <.01                |
| Other                                       | 56 (2.1%)            | 16 (2.4%)             | 16 (2.4%)             | 13 (2%)               | 11 (1.7%)             | .28                 |
| Smoking                                     | 730 (27.8%)          | 238 (36.4%)           | 183 (27.9%)           | 159 (24.2%)           | 150 (22.9%)           | <.01                |
| Alcohol use                                 | 1836 (70.0%)         | 496 (75.8%)           | 462 (70.4%)           | 444 (67.6%)           | 434 (66.3%)           | <.01                |
| Diabetes mellitus                           | 282 (10.8%)          | 24 (3.7%)             | 48 (7.3%)             | 78 (11.9%)            | 132 (20.1%)           | <.01                |
| Hypertension                                | 852 (32.9%)          | 109 (16.8%)           | 204 (31.5%)           | 236 (36.4%)           | 303 (47%)             | <.01                |
| Hyperlipidemia                              | 355 (13.2%)          | 45 (6.9%)             | 81 (12.3%)            | 96 (14.6%)            | 123 (18.8%)           | <.01                |
| Physical activity (MET-min/wk)              | 145 (0, 599)         | 213 (0, 735)          | 239 (0, 720)          | 106 (0, 533)          | 67.5 (0, 360)         | <.01                |
| Family history of cancer                    | 583 (22.2%)          | 120 (18.3%)           | 141 (21.5%)           | 155 (23.6%)           | 167 (25.5%)           | <.01                |
| <b>Biochemical characteristics</b>          |                      |                       |                       |                       |                       |                     |
| High-sensitivity C-reactive protein (mg/dL) | 2.7 (1.2, 6.3)       | 1.2 (0.5, 3.3)        | 2.3 (1.1, 5)          | 3.35 (1.65, 7.5)      | 4.6 (2.2, 10)         | <.01                |
| Interleukin-6 (pg/mL)                       | 16.97 (0.0-35.76)    | 16.85 (0, 35.36)      | 15.41 (0, 34.04)      | 18.79 (0, 39.72)      | 17.02 (0, 33.85)      | .40                 |
| Adiponectin (ug/mL)                         | 14.42 (9.60-21.43)   | 16.51 (10.86, 25.49)  | 15.03 (9.66, 22.4)    | 13.36 (8.98, 20.22)   | 13.16 (9.38, 18.57)   | <.01                |
| Leptin (ng/mL)                              | 11.90 (5.2, 25.3)    | 5.3 (1.9, 12.1)       | 11 (5.1, 23.4)        | 16.05 (7.05, 29.45)   | 21 (10.7, 35.9)       | <.01                |
| Insulin (uIU/mL)                            | 12.2 (7.3, 20.1)     | 6.7 (4.4, 10.6)       | 10.7 (7.05, 16.3)     | 15 (9.8, 22)          | 19.35 (13, 26.1)      | <.01                |
| <b>Measures of adiposity</b>                |                      |                       |                       |                       |                       |                     |
| Body weight (kg)                            | 82.10 (69.9-97.1)    | 66.22 (58.51, 74.84)  | 78.9 (70.31, 88.45)   | 87.5 (76.43, 102.06)  | 97.8 (86.9, 111.43)   | <.01                |
| Body mass index ( kg/ m <sup>2</sup> )      | 29.07 (25.21, 33.93) | 23.46 (21.4, 25.97)   | 28.03 (25.5, 30.93)   | 30.63 (27.72, 35.15)  | 34.7 (31.03, 39.5)    | <.01                |
| Waist circumference (cm)                    | 97 (87, 108.5)       | 82 (76, 88)           | 93.5 (88, 100)        | 101 (95, 110.5)       | 111.5 (103.5, 120.75) | <.01                |
| Waist hip ratio                             | 0.90 (0.84- 0.96)    | 0.85 (0.79, 0.9)      | 0.9 (0.83, 0.94)      | 0.92 (0.87, 0.98)     | 0.96 (0.9, 1)         | <.01                |
| Abdominal subcutaneous adipose tissue (kg)  | 4.17 (2.79, 6.26)    | 2.30 (1.63, 3.35)     | 3.97 (2.98, 5.39)     | 4.97 (3.68, 7.00)     | 6.26 (4.36, 8.69)     | <.01                |
| Liver fat (%)                               | 3.60 (2.11, 6.64)    | 1.98 (1.22, 2.92)     | 2.97 (2, 4.49)        | 4.41 (2.83, 7.23)     | 7.42 (4.17, 13.03)    | <.01                |
| Lower body fat (kg)                         | 8.69 (6.15, 11.91)   | 6.29 (4.14, 8.94)     | 8.59 (6.26, 11.45)    | 9.45 (6.92, 12.52)    | 10.66 (7.7, 14.43)    | <.01                |
| <b>Only women</b>                           |                      |                       |                       |                       |                       |                     |
|                                             | <b>(n= 1418)</b>     | <b>(n=354)</b>        | <b>(n=355)</b>        | <b>(n=355)</b>        | <b>(n=354)</b>        |                     |
| Postmenopausal state                        | 488 (34.7%)          | 84 (24.1%)            | 109 (30.7%)           | 131 (37.1%)           | 164 (46.6%)           | <.01                |
| Oral contraceptive use                      | 1079 (76.3%)         | 279 (79%)             | 282 (79.4%)           | 273 (77.1%)           | 245 (69.4%)           | <.01                |
| Hormone replacement therapy use             | 180 (29.5%)          | 24 (23.8%)            | 46 (31.5%)            | 54 (33.5%)            | 56 (27.6%)            | .70                 |

**Supplemental Table 2:** Cox proportional hazard models of visceral adipose tissue (VAT) and incident cancer

| <b>VAT measure</b>                                       | <b>Model 1<br/>HR (95% CI)</b> | <b>Model 2<br/>HR (95% CI)</b> | <b>Model 3<br/>HR (95% CI)</b> | <b>Model 4<br/>HR (95% CI)</b> |
|----------------------------------------------------------|--------------------------------|--------------------------------|--------------------------------|--------------------------------|
| <b>Continuous (per unit standard deviation increase)</b> | 1.20<br>(1.06- 1.36)           | 1.05<br>(0.90- 1.22)           | 1.07<br>(0.91- 1.25)           | 0.94<br>(0.77- 1.14)           |
| <b>Quartile 2 (vs quartile 1)</b>                        | 1.08<br>(0.66- 1.78)           | 0.96<br>(0.58- 1.58)           | 1.05<br>(0.63- 1.74)           | 0.95<br>(0.57- 1.59)           |
| <b>Quartile 3 (vs quartile 1)</b>                        | 1.71<br>(1.09- 2.68)           | 1.32<br>(0.84- 2.08)           | 1.45<br>(0.91- 2.31)           | 1.22<br>(0.75- 2.00)           |
| <b>Quartile 4 (vs quartile 1)</b>                        | 1.79<br>(1.14- 2.80)           | 1.21<br>(0.77- 1.91)           | 1.31<br>(0.82- 2.11)           | 1.00 (0.58-<br>1.73)           |

Data include both per 1-standard deviation increase in VAT and sex-specific quartile analysis;  
HR (95% CI) - hazard ratio (95% confidence interval)

Model 1- unadjusted (univariable in continuous and sex-specific in quartile analysis)

Model 2- additionally adjusted for age and race (and sex in continuous analysis)

Model 3- additionally adjusted for smoking, alcohol and family history of cancer

Model 4- additionally adjusted for body mass index.

**Supplemental Table 3:** Number of incident cancers and rates on incident cancer at 12 years in quartiles of visceral adipose tissue (VAT), overall and in sex and race subgroups

| Population          | Quartile 1 |                       | Quartile 2 |                       | Quartile 3 |                       | Quartile 4 |                       |
|---------------------|------------|-----------------------|------------|-----------------------|------------|-----------------------|------------|-----------------------|
|                     | N          | Cumulative % (95% CI) |
| <b>Whole cohort</b> | 30         | 4.6 (2.8- 6.3)        | 33         | 3.6 (2.2- 5.1)        | 51         | 6.2 (4.3- 8.1)        | 53         | 7.1 (5.1- 9.2)        |
| <b>Men</b>          | 19         | 6.3 (3.8- 9.7)        | 16         | 5.3 (3.1- 8.5)        | 24         | 7.9 (5.1- 11.6)       | 19         | 6.3 (3.8- 9.7)        |
| <b>Women</b>        | 11         | 3.1 (1.6- 5.5)        | 17         | 4.8 (2.8- 7.6)        | 27         | 7.6 (5.1- 10.9)       | 34         | 9.6 (6.7- 13.2)       |
| <b>White</b>        | 9          | 4.4 (2.0- 8.2)        | 16         | 7.8 (4.5- 12.3)       | 20         | 9.8 (5.3- 13.5)       | 11         | 5.4 (3.4- 10.6)       |
| <b>Non- white</b>   | 20         | 4.4 (2.7- 6.8)        | 17         | 3.8 (2.1- 6.2)        | 31         | 6.9 (4.5- 9.3)        | 43         | 9.5 (6.6- 12.1)       |

Data reported as number of incident cancers (N) and percentage (95% confidence interval)

**Supplemental Table 4:** Cox proportional hazard models of lower body fat (LBF) and incident cancer

| <b>LBF measure</b>                                       | <b>Model 1<br/>HR (95% CI)</b> | <b>Model 2<br/>HR (95% CI)</b> | <b>Model 3<br/>HR (95% CI)</b> | <b>Model 4<br/>HR (95% CI)</b> |
|----------------------------------------------------------|--------------------------------|--------------------------------|--------------------------------|--------------------------------|
| <b>Continuous (per unit standard deviation increase)</b> | 0.93<br>(0.79- 1.09)           | 0.89<br>(0.72- 1.09)           | 0.92<br>(0.74- 1.13)           | 0.69<br>(0.52- 0.92)           |
| <b>Quartile 2 (vs quartile 1)</b>                        | 0.68<br>(0.44- 1.07)           | 0.63<br>(0.41- 1.00)           | 0.67<br>(0.43- 1.05)           | 0.58<br>(0.36- 0.91)           |
| <b>Quartile 3 (vs quartile 1)</b>                        | 0.87<br>(0.58- 1.31)           | 0.77<br>(0.51- 1.17)           | 0.82<br>(0.54- 1.24)           | 0.61<br>(0.39- 0.98)           |
| <b>Quartile 4 (vs quartile 1)</b>                        | 0.76<br>(0.49- 1.17)           | 0.70<br>(0.46- 1.08)           | 0.74<br>(0.47- 1.14)           | 0.43<br>(0.24- 0.78)           |

Data include both per 1-standard deviation increase in LBF and sex-specific quartile analysis; HR (95% CI) - hazard ratio (95% confidence interval)

Model 1- unadjusted (univariable in continuous and sex-specific in quartile analysis)

Model 2- additionally adjusted for age and race (and sex in continuous analysis)

Model 3- additionally adjusted for smoking, alcohol and family history of cancer

Model 4- additionally adjusted for body mass index.

**Supplemental Table 5:** Cox proportional hazard models of Subcutaneous Adipose Tissue (SAT) and Liver Fat and incident cancer

| <b>Adiposity measure</b> | <b>Model 1<br/>HR (95% CI)</b> | <b>Model 2<br/>HR (95% CI)</b> | <b>Model 3<br/>HR (95% CI)</b> | <b>Model 4<br/>HR (95% CI)</b> |
|--------------------------|--------------------------------|--------------------------------|--------------------------------|--------------------------------|
| <b>SAT</b>               | 1.13<br>(0.97- 1.31)           | 1.16<br>(0.97- 1.39)           | 1.20<br>(1.00- 1.43)           | 1.08<br>(0.78- 1.51)           |
| <b>Liver fat</b>         | 0.91<br>(0.79- 1.06)           | 0.88<br>(0.75- 1.03)           | 0.98<br>(0.93- 0.99)           | 0.96<br>(0.93- 1.01)           |

Data include both per 1-standard deviation increase in SAT and liver fat; HR (95% CI) - hazard ratio (95% confidence interval)

Model 1- unadjusted (univariable)

Model 2- additionally adjusted for age, race and sex

Model 3- additionally adjusted for smoking, alcohol and family history of cancer

Model 4- additionally adjusted for body mass index.

**Supplemental Table 6:** Cox proportional hazard models of visceral adipose tissue (VAT) and incident cancer in **Males**

| <b>VAT measure</b>                                       | <b>Model 1<br/>HR (95% CI)</b> | <b>Model 2<br/>HR (95% CI)</b> | <b>Model 3<br/>HR (95% CI)</b> | <b>Model 4<br/>HR (95% CI)</b> |
|----------------------------------------------------------|--------------------------------|--------------------------------|--------------------------------|--------------------------------|
| <b>Continuous (per unit standard deviation increase)</b> | 1.01<br>(0.81- 1.25)           | 0.85<br>(0.68- 1.07)           | 0.83<br>(0.65- 1.05)           | 0.75<br>(0.57- 1.01)           |
| <b>Quartile 2 (vs quartile 1)</b>                        | 0.82<br>(0.43- 1.60)           | 0.85<br>(0.43- 1.67)           | 0.84<br>(0.42- 1.68)           | 0.81<br>(0.40- 1.62)           |
| <b>Quartile 3 (vs quartile 1)</b>                        | 1.28<br>(0.70- 2.32)           | 0.99<br>(0.54- 1.82)           | 0.94<br>(0.49- 1.78)           | 0.85<br>(0.43- 1.74)           |
| <b>Quartile 4 (vs quartile 1)</b>                        | 1.00<br>(0.53- 1.90)           | 0.70<br>(0.35- 1.39)           | 0.64<br>(0.32- 1.28)           | 0.56<br>(0.25- 1.25)           |

Data include both per 1-standard deviation increase in VAT and sex-specific quartile analysis; HR (95% CI) - hazard ratio (95% confidence interval)

Model 1- unadjusted (univariable in continuous and sex-specific in quartile analysis)

Model 2- additionally adjusted for age and race

Model 3- additionally adjusted for smoking, alcohol and family history of cancer

Model 4- additionally adjusted for body mass index.



**Supplemental Table 7:** Cox proportional hazard models of visceral adipose tissue (VAT) and incident cancer in **Females**

| VAT measure                                              | Model 1<br>HR (95% CI) | Model 2<br>HR (95% CI) | Model 3<br>HR (95% CI) | Model 4<br>HR (95% CI) |
|----------------------------------------------------------|------------------------|------------------------|------------------------|------------------------|
| <b>Continuous (per unit standard deviation increase)</b> | 1.51<br>(1.27- 1.80)   | 1.33<br>(1.11- 1.59)   | 1.38<br>(1.15- 1.64)   | 1.24<br>(0.98-- 1.58)  |
| <b>Quartile 2 (vs quartile 1)</b>                        | 1.53<br>(0.72- 3.27)   | 1.29<br>(0.60- 2.75)   | 1.46<br>(0.66- 3.19)   | 1.27<br>(0.56- 2.85)   |
| <b>Quartile 3 (vs quartile 1)</b>                        | 2.45<br>(1.21- 4.95)   | 1.94<br>(0.96- 3.95)   | 2.25<br>(1.08- 4.67)   | 1.80<br>(0.82- 3.95)   |
| <b>Quartile 4 (vs quartile 1)</b>                        | 3.16<br>(1.60- 6.25)   | 2.19<br>(1.11 4.33)    | 2.60<br>(1.25- 5.35)   | 1.83<br>(0.79- 4.27)   |

Data include both per 1-standard deviation increase in VAT and sex-specific quartile analysis; HR (95% CI) - hazard ratio (95% confidence interval)

Model 1- unadjusted (univariable in continuous and sex-specific in quartile analysis)

Model 2- additionally adjusted for age and race

Model 3- additionally adjusted for smoking, alcohol and family history of cancer

Model 4- additionally adjusted for body mass index.

**Supplemental Table 8:** Cox proportional hazard models of visceral adipose tissue (VAT) and incident cancer in **Whites**

| VAT measure                                              | Model 1<br>HR (95% CI) | Model 2<br>HR (95% CI) | Model 3<br>HR (95% CI) | Model 4<br>HR (95% CI) |
|----------------------------------------------------------|------------------------|------------------------|------------------------|------------------------|
| <b>Continuous (per unit standard deviation increase)</b> | 0.98<br>(0.79- 1.22)   | 0.84<br>(0.63- 1.12)   | 0.87<br>(0.66- 1.16)   | 0.71<br>(0.47- 1.08)   |
| <b>Quartile 2 (vs quartile 1)</b>                        | 1.73<br>(0.77- 3.88)   | 1.50<br>(0.66- 3.41)   | 1.69<br>(0.72- 3.96)   | 1.46<br>(0.60- 3.52)   |
| <b>Quartile 3 (vs quartile 1)</b>                        | 2.21<br>(1.01- 4.82)   | 1.63<br>(0.74- 3.60)   | 1.78<br>(0.79- 4.05)   | 1.39<br>(0.56- 3.41)   |
| <b>Quartile 4 (vs quartile 1)</b>                        | 1.18<br>(0.50- 2.82)   | 0.75<br>(0.31- 1.85)   | 0.87<br>(0.34- 2.22)   | 0.54<br>(0.18- 1.66)   |

Data include both per 1-standard deviation increase in VAT and sex-specific quartile analysis; HR (95% CI) - hazard ratio (95% confidence interval)

Model 1- unadjusted (univariable in continuous and sex-specific in quartile analysis)

Model 2- additionally adjusted for age (and sex in continuous analysis)

Model 3- additionally adjusted for smoking, alcohol and family history of cancer

Model 4- additionally adjusted for body mass index.

**Supplemental Table 9:** Cox proportional hazard models of visceral adipose tissue (VAT) and incident cancer in **Non- whites**

| VAT measure                                              | Model 1<br>HR (95% CI) | Model 2<br>HR (95% CI) | Model 3<br>HR (95% CI) | Model 4<br>HR (95% CI) |
|----------------------------------------------------------|------------------------|------------------------|------------------------|------------------------|
| <b>Continuous (per unit standard deviation increase)</b> | 1.35<br>(1.15- 1.59)   | 1.18<br>(0.98- 1.43)   | 1.18<br>(0.98- 1.45)   | 1.07<br>(0.85- 1.35)   |
| <b>Quartile 2 (vs quartile 1)</b>                        | 0.85<br>(0.44- 1.63)   | 0.71<br>(0.37- 1.37)   | 0.74<br>(0.38- 1.43)   | 0.68<br>(0.35- 1.32)   |
| <b>Quartile 3 (vs quartile 1)</b>                        | 1.54<br>(0.88- 2.71)   | 1.18<br>(0.67- 2.08)   | 1.26<br>(0.70- 2.26)   | 1.09<br>(0.59- 2.01)   |
| <b>Quartile 4 (vs quartile 1)</b>                        | 2.28<br>(1.39- 3.89)   | 1.51<br>(0.89- 2.58)   | 1.57<br>(0.90- 2.76)   | 1.26<br>(0.68- 2.36)   |

Data include both per 1-standard deviation increase in VAT and sex-specific quartile analysis; HR (95% CI) - hazard ratio (95% confidence interval)

Model 1- unadjusted (univariable in continuous and sex-specific in quartile analysis)

Model 2- additionally adjusted for age (and sex in continuous analysis)

Model 3- additionally adjusted for smoking, alcohol and family history of cancer

Model 4- additionally adjusted for body mass index.

**Supplemental Table 10A:** Cox proportional hazard models of **Waist Circumference (WC)** and **Waist Hip Ratio (WHR)** and incident cancer

| <b>Adiposity measure</b> | <b>Unadjusted model<br/>HR (95% CI)</b> | <b>Fully adjusted model<br/>HR (95% CI)</b> |
|--------------------------|-----------------------------------------|---------------------------------------------|
| <b>WC</b>                | 1.23<br>(1.06- 1.43)                    | 1.03<br>(0.74- 1.43)                        |
| <b>WHR</b>               | 1.28<br>(1.10- 1.50)                    | 1.12<br>(0.89- 1.40)                        |

Data per 1-standard deviation increase in adiposity measure, HR (95% CI) - hazard ratio (95% confidence interval)

Fully adjusted model adjusted for age, race, sex, smoking, alcohol, family history of cancer and body mass index

**Supplemental Table 10B:** Cox proportional hazard models of Body mass index (BMI) categories and incident cancer

| <b>BMI (kg/m<sup>2</sup>)</b>           | <b>Model 1<br/>HR (95% CI)</b> | <b>Model 2<br/>HR (95% CI)</b> | <b>Model 3<br/>HR (95% CI)</b> |
|-----------------------------------------|--------------------------------|--------------------------------|--------------------------------|
| <b>BMI 25-29.9 (vs BMI 18.5- 24.9)</b>  | 0.90<br>(0.59- 1.39)           | 0.81<br>(0.53- 1.24)           | 0.88<br>(0.58- 1.36)           |
| <b>BMI 30-34.9 (vs BMI 18.5- 24.9)</b>  | 1.09<br>(0.71- 1.71)           | 0.97<br>(0.62- 1.52)           | 1.04<br>(0.66- 1.64)           |
| <b>BMI 35- 39.9 (vs BMI 18.5- 24.9)</b> | 1.17<br>(0.75- 1.81)           | 1.12<br>(0.72- 1.75)           | 1.24<br>(0.78- 1.97)           |

Data comparing BMI categories;

HR (95% CI) - hazard ratio (95% confidence interval)

Model 1- unadjusted

Model 2- additionally adjusted for age, sex and race

Model 3- additionally adjusted for smoking, alcohol and family history of cancer

**Supplemental Table 10C:** Cox proportional hazard models of Triglyceride- waist circumference (TG-WC) index and incident cancer

| <b>TG-WC index</b>            | <b>Model 1<br/>HR (95% CI)</b> | <b>Model 2<br/>HR (95% CI)</b> | <b>Model 3<br/>HR (95% CI)</b> |
|-------------------------------|--------------------------------|--------------------------------|--------------------------------|
| <b>Positive (vs negative)</b> | 1.02<br>(0.66- 1.56)           | 0.92<br>(0.59- 1.42)           | 0.88<br>(0.57- 1.37)           |

Data comparing TG-WC index positive versus not;

HR (95% CI) - hazard ratio (95% confidence interval)

Model 1- unadjusted

Model 2- additionally adjusted for age, sex and race

Model 3- additionally adjusted for smoking, alcohol, family history of cancer and BMI

**Supplemental Table 11: Cox proportional hazard models of visceral adipose tissue (VAT) and incident cancer including cancer cases diagnosed in the 1 year censoring period**

| VAT measure                                              | Model 1<br>HR (95% CI) | Model 2<br>HR (95% CI) | Model 3<br>HR (95% CI) | Model 4<br>HR (95% CI) |
|----------------------------------------------------------|------------------------|------------------------|------------------------|------------------------|
| <b>Continuous (per unit standard deviation increase)</b> | 1.20<br>(1.06- 1.36)   | 1.05<br>(0.89- 1.22)   | 1.06<br>(0.91- 1.25)   | 0.94<br>(0.77- 1.14)   |
| <b>Quartile 2 (vs quartile 1)</b>                        | 1.08<br>(0.66- 1.78)   | 0.96<br>(0.58- 1.58)   | 1.04<br>(0.63- 1.74)   | 0.95<br>(0.57- 1.59)   |
| <b>Quartile 3 (vs quartile 1)</b>                        | 1.71<br>(1.09- 2.69)   | 1.32<br>(0.84- 2.08)   | 1.45<br>(0.91- 2.31)   | 1.22<br>(0.75- 2.00)   |
| <b>Quartile 4 (vs quartile 1)</b>                        | 1.79<br>(1.14- 2.80)   | 1.21<br>(0.77- 1.91)   | 1.31<br>(0.82- 2.12)   | 1.00<br>(0.58- 1.73)   |

Data include both per 1-standard deviation increase in VAT and sex-specific quartile analysis; HR (95% CI) - hazard ratio (95% confidence interval)

Model 1- unadjusted (univariable in continuous and sex-specific in quartile analysis)

Model 2- additionally adjusted for age and race (and sex in continuous analysis)

Model 3- additionally adjusted for smoking, alcohol and family history of cancer

Model 4- additionally adjusted for body mass index.

**Supplemental Table 12:** Cox proportional hazard models of visceral adipose tissue (VAT) and incident cancer **excluding lung and esophageal cancer cases**

| VAT measure                                              | Model 1<br>HR (95% CI) | Model 2<br>HR (95% CI) | Model 4<br>HR (95% CI) | Model 5<br>HR (95% CI) |
|----------------------------------------------------------|------------------------|------------------------|------------------------|------------------------|
| <b>Continuous (per unit standard deviation increase)</b> | 1.24<br>(1.06- 1.43)   | 1.22<br>(1.11- 1.52)   | 1.08<br>(0.91- 1.31)   | 0.91<br>(0.74- 1.11)   |
| <b>Quartile 2 (vs quartile 1)</b>                        | 1.21<br>(0.76- 2.11)   | 1.22<br>(0.72- 2.06)   | 1.13<br>(0.67- 1.93)   | 1.00<br>(0.58- 1.71)   |
| <b>Quartile 3 (vs quartile 1)</b>                        | 1.93<br>(1.19- 3.13)   | 1.94<br>(1.19- 3.13)   | 1.57<br>(0.95- 2.48)   | 1.18<br>(0.71- 2.14)   |
| <b>Quartile 4 (vs quartile 1)</b>                        | 1.97<br>(1.21- 3.21)   | 1.93<br>(1.19- 3.17)   | 1.26<br>(0.81- 2.15)   | 1.01<br>(0.54- 1.81)   |

Data include both per 1-standard deviation increase in VAT and sex-specific quartile analysis; HR (95% CI) - hazard ratio (95% confidence interval)

Model 1- unadjusted (univariable in continuous and sex-specific in quartile analysis)

Model 2- additionally adjusted for age and race (and sex in continuous analysis)

Model 3- additionally adjusted for smoking, alcohol and family history of cancer

Model 4- additionally adjusted for body mass index.



**Supplemental Table 13:** Cox proportional hazard models of visceral adipose tissue (VAT) and incident cancer **excluding lung and esophageal cancer cases, and hematological malignancies**

| VAT measure                                              | Model 1<br>HR (95% CI) | Model 2<br>HR (95% CI) | Model 3<br>HR (95% CI) | Model 4<br>HR (95% CI) |
|----------------------------------------------------------|------------------------|------------------------|------------------------|------------------------|
| <b>Continuous (per unit standard deviation increase)</b> | 1.22<br>(1.07- 1.38)   | 1.07<br>(0.92- 1.26)   | 1.07<br>(0.92- 1.27)   | 0.94<br>(0.76- 1.15)   |
| <b>Quartile 2 (vs quartile 1)</b>                        | 1.24<br>(0.73- 2.10)   | 1.13<br>(0.66- 1.92)   | 1.19<br>(0.69- 2.05)   | 1.07<br>(0.62- 1.85)   |
| <b>Quartile 3 (vs quartile 1)</b>                        | 1.93<br>(1.19- 3.13)   | 1.54<br>(0.95- 2.50)   | 1.61<br>(0.98- 2.65)   | 1.33<br>(0.77- 2.26)   |
| <b>Quartile 4 (vs quartile 1)</b>                        | 1.94<br>(1.20- 3.15)   | 1.33<br>(0.80- 2.13)   | 1.36<br>(0.82- 2.26)   | 1.00<br>(0.56- 1.78)   |

Data include both per 1-standard deviation increase in VAT and sex-specific quartile analysis; HR (95% CI) - hazard ratio (95% confidence interval)

Model 1- unadjusted (univariable in continuous and sex-specific in quartile analysis)

Model 2- additionally adjusted for age and race (and sex in continuous analysis)

Model 3- additionally adjusted for smoking, alcohol and family history of cancer

Model 4- additionally adjusted for body mass index.

**Supplemental Table 14:** Cox proportional hazard models of visceral adipose tissue (VAT) and incident cancer **excluding breast and prostate cancer cases**

| VAT measure                                              | Model 1<br>HR (95% CI) | Model 2<br>HR (95% CI) | Model 3<br>HR (95% CI) | Model 4<br>HR (95% CI) |
|----------------------------------------------------------|------------------------|------------------------|------------------------|------------------------|
| <b>Continuous (per unit standard deviation increase)</b> | 1.21<br>(1.03- 1.43)   | 1.06<br>(0.87- 1.31)   | 1.09<br>(0.89- 1.34)   | 0.98<br>(0.76- 1.27)   |
| <b>Quartile 2 (vs quartile 1)</b>                        | 0.93<br>(0.48- 1.80)   | 0.85<br>(0.44- 1.66)   | 0.91<br>(0.46- 1.79)   | 0.84<br>(0.43- 1.65)   |
| <b>Quartile 3 (vs quartile 1)</b>                        | 1.54<br>(0.85- 2.78)   | 1.24<br>(0.69- 2.24)   | 1.34<br>(0.74- 2.43)   | 1.16<br>(0.62- 2.17)   |
| <b>Quartile 4 (vs quartile 1)</b>                        | 1.66<br>(0.93- 2.98)   | 1.17<br>(0.65- 2.09)   | 1.27<br>(0.69- 2.31)   | 1.01<br>(0.51- 2.00)   |

Data include both per 1-standard deviation increase in VAT and sex-specific quartile analysis; HR (95% CI) - hazard ratio (95% confidence interval)

Model 1- unadjusted (univariable in continuous and sex-specific in quartile analysis)

Model 2- additionally adjusted for age and race (and sex in continuous analysis)

Model 3- additionally adjusted for smoking, alcohol and family history of cancer

Model 4- additionally adjusted for body mass index.

**Supplemental Table 15:** Cox proportional hazard models of visceral adipose tissue (VAT) and incident **obesity- associated cancers**

| VAT measure                                              | Model 1<br>HR (95% CI) | Model 2<br>HR (95% CI) | Model 3<br>HR (95% CI) | Model 4<br>HR (95% CI) |
|----------------------------------------------------------|------------------------|------------------------|------------------------|------------------------|
| <b>Continuous (per unit standard deviation increase)</b> | 1.08<br>(0.87- 1.33)   | 1.21<br>(0.93- 1.58)   | 1.25<br>(0.96- 1.62)   | 1.13<br>(0.80- 1.59)   |
| <b>Quartile 2 (vs quartile 1)</b>                        | 0.98<br>(0.44- 2.18)   | 0.91<br>(0.41- 2.02)   | 1.01<br>(0.44- 2.33)   | 0.86<br>(0.37- 2.00)   |
| <b>Quartile 3 (vs quartile 1)</b>                        | 1.71<br>(0.84- 3.47)   | 1.38<br>(0.68- 2.81)   | 1.54<br>(0.74- 3.24)   | 1.15<br>(0.52- 2.55)   |
| <b>Quartile 4 (vs quartile 1)</b>                        | 1.96<br>(0.98- 3.93)   | 1.40<br>(0.69- 2.84)   | 1.58<br>(0.75- 3.32)   | 0.99<br>(0.43- 2.28)   |

Data include both per 1-standard deviation increase in VAT and sex-specific quartile analysis; HR (95% CI) - hazard ratio (95% confidence interval)

Model 1- unadjusted (univariable in continuous and sex-specific in quartile analysis)

Model 2- additionally adjusted for age and race (and sex in continuous analysis)

Model 3- additionally adjusted for smoking, alcohol and family history of cancer

Model 4- additionally adjusted for body mass index.

**Supplemental Table 16:** Cox proportional hazard models of visceral adipose tissue (VAT) and incident **visceral cancers**

| VAT measure                                              | Model 1<br>HR (95% CI) | Model 2<br>HR (95% CI) | Model 3<br>HR (95% CI) | Model 4<br>HR (95% CI) |
|----------------------------------------------------------|------------------------|------------------------|------------------------|------------------------|
| <b>Continuous (per unit standard deviation increase)</b> | 1.47<br>(1.09- 1.99)   | 1.14<br>(0.82- 1.59)   | 1.09<br>(0.78- 1.55)   | 1.21<br>(0.76- 1.93)   |
| <b>Quartile 2 (vs quartile 1)</b>                        | 0.98<br>(0.25- 3.92)   | 0.90<br>(0.23- 3.59)   | 0.83<br>(0.20- 3.33)   | 0.99<br>(0.24- 4.12)   |
| <b>Quartile 3 (vs quartile 1)</b>                        | 2.42<br>(0.77- 7.71)   | 1.95<br>(0.62- 6.16)   | 1.75<br>(0.53- 5.74)   | 2.38<br>(0.59- 9.60)   |
| <b>Quartile 4 (vs quartile 1)</b>                        | 1.71<br>(0.450- 5.82)  | 1.22<br>(0.35- 4.20)   | 1.09<br>(0.31- 3.78)   | 1.76<br>(0.44- 7.01)   |

Data include both per 1-standard deviation increase in VAT and sex-specific quartile analysis; HR (95% CI) - hazard ratio (95% confidence interval)

Model 1- unadjusted (univariable in continuous and sex-specific in quartile analysis)

Model 2- additionally adjusted for age and race (and sex in continuous analysis)

Model 3- additionally adjusted for smoking, alcohol and family history of cancer

Model 4- additionally adjusted for body mass index.

**Supplemental Table 17: Cox proportional hazard models of Lower Body Fat (LBF) and incident cancer in Males**

| <b>LBF measure</b>                                       | <b>Model 1<br/>HR (95% CI)</b> | <b>Model 2<br/>HR (95% CI)</b> | <b>Model 3<br/>HR (95% CI)</b> | <b>Model 4<br/>HR (95% CI)</b> |
|----------------------------------------------------------|--------------------------------|--------------------------------|--------------------------------|--------------------------------|
| <b>Continuous (per unit standard deviation increase)</b> | 0.89<br>(0.69- 1.16)           | 0.87<br>(0.65- 1.16)           | 0.84<br>(0.62- 1.13)           | 0.85<br>(0.57- 1.28)           |
| <b>Quartile 2 (vs quartile 1)</b>                        | 0.66<br>(0.35- 1.24)           | 0.62<br>(0.33- 1.18)           | 0.61<br>(0.32- 1.15)           | 0.61<br>(0.32- 1.16)           |
| <b>Quartile 3 (vs quartile 1)</b>                        | 0.70<br>(0.38- 1.29)           | 0.60<br>(0.32- 1.14)           | 0.58<br>(0.31- 1.11)           | 0.58<br>(0.28- 1.23)           |
| <b>Quartile 4 (vs quartile 1)</b>                        | 0.69<br>(0.37- 1.29)           | 0.66<br>(0.35- 1.24)           | 0.60<br>(0.31- 1.14)           | 0.60<br>(0.26- 1.38)           |

Data include both per 1-standard deviation increase in VAT and sex-specific quartile analysis;  
HR (95% CI) - hazard ratio (95% confidence interval)

Model 1- unadjusted (univariable in continuous and sex-specific in quartile analysis)

Model 2- additionally adjusted for age and race

Model 3- additionally adjusted for smoking, alcohol and family history of cancer

Model 4- additionally adjusted for body mass index.

**Supplemental Table 18: Cox proportional hazard models of Lower Body Fat (LBF) and incident cancer in Females**

| <b>LBF measure</b>                                       | <b>Model 1<br/>HR (95% CI)</b> | <b>Model 2<br/>HR (95% CI)</b> | <b>Model 3<br/>HR (95% CI)</b> | <b>Model 4<br/>HR (95% CI)</b> |
|----------------------------------------------------------|--------------------------------|--------------------------------|--------------------------------|--------------------------------|
| <b>Continuous (per unit standard deviation increase)</b> | 0.96<br>(0.78- 1.18)           | 0.94<br>(0.75- 1.17)           | 1.00<br>(0.80- 1.25)           | 0.62<br>(0.44- 0.87)           |
| <b>Quartile 2 (vs quartile 1)</b>                        | 0.72<br>(0.39- 1.36)           | 0.66<br>(0.35- 1.26)           | 0.74<br>(0.39- 1.40)           | 0.58<br>(0.30- 1.13)           |
| <b>Quartile 3 (vs quartile 1)</b>                        | 1.05<br>(0.60- 1.86)           | 0.96<br>(0.55- 1.69)           | 1.08<br>(0.61- 1.90)           | 0.63<br>(0.33- 1.20)           |
| <b>Quartile 4 (vs quartile 1)</b>                        | 0.85<br>(0.47- 1.55)           | 0.78<br>(0.43- 1.43)           | 0.92<br>(0.49- 1.71)           | 0.33<br>(0.14- 0.80)           |

Data include both per 1-standard deviation increase in VAT and sex-specific quartile analysis;  
HR (95% CI) - hazard ratio (95% confidence interval)

Model 1- unadjusted (univariable in continuous and sex-specific in quartile analysis)

Model 2- additionally adjusted for age and race

Model 3- additionally adjusted for smoking, alcohol and family history of cancer

Model 4- additionally adjusted for body mass index.

**Supplemental Table 19:** Levels of liver fat in racial groups, and number of incident cancers and rates of incident cancer at 12 years in each quartile of race-adjusted liver fat

| Racial group    | Liver fat, %, median (interquartile range) | Quartile 1 |                | Quartile 2 |                 | Quartile 3 |                  | Quartile 4 |                 |
|-----------------|--------------------------------------------|------------|----------------|------------|-----------------|------------|------------------|------------|-----------------|
|                 |                                            | N          | % (95% CI)     | N          | % (95% CI)      | N          | % (95% CI)       | N          | % (95% CI)      |
| <b>Black</b>    | 3.3 (2.0 – 5.4)                            | 17         | 6.5 (4.1-10.6) | 13         | 5.0 (2.7- 8.3)  | 22         | 8.4 (5.3- 12.4)  | 23         | 8.8 (5.4- 13.1) |
| <b>White</b>    | 3.6 (2.1- 7.1)                             | 7          | 4.2 (1.7- 8.4) | 14         | 8.3 (4.1- 13.2) | 17         | 10.1 (6.4- 16.3) | 13         | 7.7 (3.8- 12.7) |
| <b>Hispanic</b> | 4.7 (2.7- 11.0)                            | 2          | 2.1 (0.2- 7.3) | 3          | 3.1 (0.6- 8.9)  | 6          | 6.3 (2.3- 13.0)  | 1          | 1.0 (0.0- 5.7)  |

Data reported as number of incident cancers (N) and incidence percentage (95% confidence interval)

**Supplemental Table 20:** Cox proportional hazard models of **Liver fat** and incident cancer in **Racial groups**

| <b>Racial group</b> | <b>Unadjusted model<br/>HR (95% CI)</b> | <b>Fully adjusted model<br/>HR (95% CI)</b> |
|---------------------|-----------------------------------------|---------------------------------------------|
| <b>Blacks</b>       | 1.07<br>(0.90- 1.29)                    | 1.01<br>(0.71- 1.18)                        |
| <b>Whites</b>       | 0.91<br>(0.71- 1.15)                    | 0.80<br>(0.59- 1.08)                        |
| <b>Hispanics</b>    | 0.67<br>(0.43- 1.05)                    | 0.77<br>(0.47- 1.05)                        |

Data as 1-standard deviation increase in Liver fat;

HR (95% CI) - hazard ratio (95% confidence interval)

Fully adjusted model adjusted for age, sex, smoking, alcohol, family history of cancer and body mass index.



**Supplemental Figure:** Flow Diagram of the Dallas Heart Study Cohort

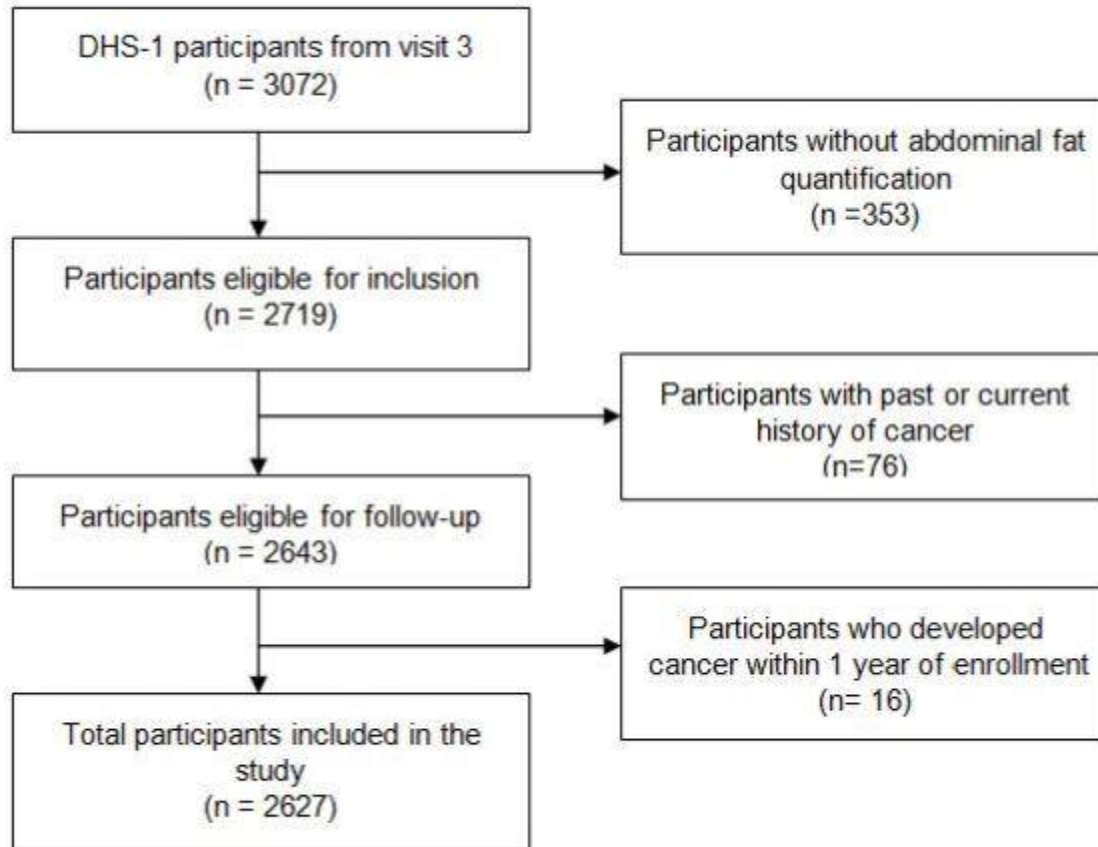

Supplement: NIHMS848159-supplement.pdf [file NIHMS848159-supplement.pdf]
